# Supplementary material for: Biotechnological Potential of the Stress Response and Plant Cell Death Regulators Proteins in the Biofuel Industry
Source: MDPI journal article supplement (doi:10.3390/cells12162018), 2023-08-08
Supplement: s1 [file s1]

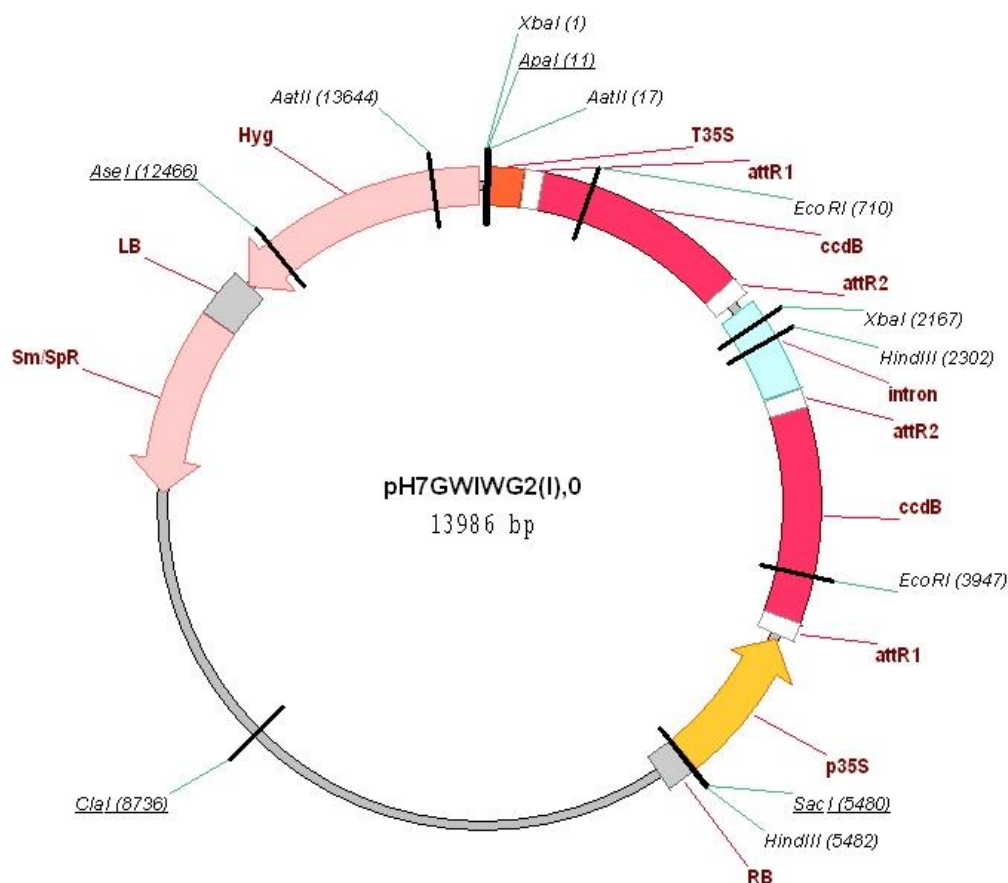

ID pH7GWIWG2(I),0 standard; circular DNA; ; 13986 BP.

CC This file is created by Vector NTI

CC <http://www.informaxinc.com/>

CC VNTDATE|342016955|

CC VNTDBDATE|342018061|

CC LSOWNER|

CC VNTAUTHORNAME|Mansour Karimi|

CC VNTAUTHORTEL|+3193313850|

CC VNTAUTHOREML|mansour.karimi@psb.ugent.be|

FH Key Location/Qualifiers

FH

FT intron complement(2035..2678)

FT           /vntifkey="15"

FT           /label=intron

FT misc\_recomb   complement(4273..4397)

FT           /vntifkey="86"

FT           /label=attR1

FT misc\_recomb   complement(2693..2817)

FT           /vntifkey="86"

FT           /label=attR2

FT misc\_feature   complement(2818..4272)

FT           /vntifkey="21"

FT           /label=CmR-ccdB

FT terminator    28..253

FT           /vntifkey="43"

FT           /label=T35S

FT misc\_recomb   263..387

FT           /vntifkey="86"

FT           /label=attR1

FT misc\_recomb   1843..1967

FT           /vntifkey="86"

FT           /label=attR2

FT misc\_feature   388..1842

FT           /vntifkey="21"

FT           /label=CmR-ccdB

FT misc\_signal    5482..5681

FT           /vntifkey="87"

FT           /label=RB

FT misc\_structure complement(10585..11834)

FT /vntifkey="88"

FT /label=Sm/SpR

FT misc\_signal 11840..12172

FT /vntifkey="87"

FT /label=LB

FT misc\_marker complement(12176..13962)

FT /vntifkey="22"

FT /label=Hyg

FT promoter complement(4425..5462)

FT /vntifkey="29"

FT /label=p35S

SQ Sequence 13986 BP; 3509 A; 3559 C; 3558 G; 3360 t;

ctagagggcc cgacgtcgca tgcctgcagg tctactggatt ttggttttag gaattagaaa 60

ttttattgat agaagtattt tacaataca aatacactact aagggtttct tatatgctca 120

acacatgagc gaaaccctat aagaacccta attcccttat ctgggaacta ctacacatt 180

attctggaga aaaatagaga gagatagatt thtagagaga gactggtgat tttgcggac 240

tctagcatgg ccgcgggata tcacaagttt gtacaaaaaa gctgaacgag aaacgtaaaa 300

tgatataaat atcaatatat taaattagat ttgcataaa aaacagacta cataatactg 360

taaaacacaa catatccagt cactatggcg gccgcattag gcaccccagg ctttacatt 420

tatgcttccg gctcgtataa tgtgtggatt ttgagttagg atccggcgag attttcagga 480

gctaaggaag ctaaaatgga gaaaaaaatc actggatata ccaccgttga tatatccaa 540

tggcacgta aagaacattt tgaggcattt cagtcagttg ctcaatgtac ctataaccag 600

accgttcagc tggatattac ggccttttta aagaccgtaa agaaaaataa gcacaagttt 660

tatccggcct ttattcacat tcttgccgc ctgatgaatg ctcacccgga attccgtatg 720

gcaatgaaag acggtgagct ggtgatatgg gatagtgttc acccttgta caccgttttc 780

catgagcaaa ctgaaacgtt ttcatcgctc tggagtgaat accacgacga ttccggcag 840  
tttctacaca tatattcgca agatgtggcg tgttacgggtg aaaacctggc ctatttcct 900  
aaagggttta ttgagaatat gtttttcgtc tcagccaatc cctgggtgag ttcaccagt 960  
tttgatttaa acgtggccaa tatggacaac ttctcgccc ccgttttcac catgggcaaa 1020  
tattatacgc aaggcgacaa ggtgctgatg ccgctggcga ttcaggttca tcatgccgtc 1080  
tgtgatggct tccatgtcgg cagaatgctt aatgaattac aacagtactg cgatgagtgg 1140  
cagggcgggg cgtaaaccg tggatccggc ttactaaaag ccagataaca gtatgcgtat 1200  
ttgcgcgtg atttttgcgg tataagaata tatactgata tgtatacccg aagtatgtca 1260  
aaaagagggtg tgctatgaag cagcgtatta cagtacagt tgacagcgac agctatcagt 1320  
tgctcaaggc atatatgatg tcaatatctc cggctcggta agcacaacca tgcagaatga 1380  
agcccgctgt ctgcgtgccg aacgtggaa agcggaaaat caggaaggga tggctgaggt 1440  
cgcccggtt attgaaatga acggctctt tgctgacgag aacagggact ggtgaaatgc 1500  
agttaagggt ttacacctat aaaagagaga gccgttatcg tctgtttgtg gatgtacaga 1560  
gtgatattat tgacacgccc gggcgacgga tggatgcc cctggccagt gcacgtctgc 1620  
tgtcagataa agtctccgt gaactttacc cgggtgtgca tatcggggat gaaagctggc 1680  
gcatgatgac caccgatatg gccagtgtgc cggctccgt tatcggggaa gaagtggctg 1740  
atctcagcca ccgcgaaaat gacatcaaaa acgccattaa cctgatgttc tggggaatat 1800  
aaatgtcagg ctccctata cacagccagt ctgcaggtcg accatagtga ctggatatgt 1860  
tgtgtttac agtattatgt agtctgttt ttatgcaaaa tctaatttaa tatattgata 1920  
tttatatcat ttacgtttc tgttcagct ttctgtaca aagtggatgat atcactagt 1980  
cggccgcctg caggtcgacc atatggcga cctgcaggcg gccgcactag tgatgctgtt 2040  
atgttcagt tcaagctgac ctgcaaacac gttaaagtct aagaagttag aatatatgag 2100  
acacgttaac tggatatga ataagctgta aataaccgag tataaactca ttaactaata 2160  
tcaccttag agtataatat aatcaaattc gacaattga cttcaagag taggctaata 2220  
taaaatcttt atatatctt acaatgttca aagaacagt tgcactaaa ccctatggc 2280  
catcaaattc aatgaacgt aagcttaata tgacttcaa taaagtctca taccaacaag 2340

tgccacctta ttcaaccatc aagaaaaag ccaaaattta tgctactcta aggaaaactt 2400  
 cactaaagaa gacgatttag agtgttttac caagaatttc tgtcatctta ctaaacaact 2460  
 aaagatcggg gtgatacaaa acctaatttc attaaagttt atgctaaaat aagcataatt 2520  
 ttaccacta agcgtgacca gataaacata actcagcaca ccagagcata tatattgggtg 2580  
 gctcaaatca tagaaactta cagtgaagac acagaaagcc gtaagaagag gcaagagtat 2640  
 gaaaccttac ctcatcttt ccatgagggt gcttctgac ccgcgggata tcaccacttt 2700  
 gtacaagaaa gctgaacgag aaacgtaaaa tgatataaat atcaatatat taaattagat 2760  
 ttgcataaa aaacagacta cataaactg taaaacacaa catatccagt cactatgggtc 2820  
 gacctgcaga ctggctgtgt ataaggagc ctgacattta tattccccag aacatcaggt 2880  
 taatggcggt ttgatgtca ttttcgggt ggctgagatc agccacttct tccccgataa 2940  
 cggagaccgg cacactggcc atacgggtgg tcatcatgcg ccagcttca tccccgatat 3000  
 gcaccaccgg gtaaagtta cgggagactt tatctgacag cagacgtgca ctggccaggg 3060  
 ggatcacat ccgtgcccc ggctgtgcaa taatatcact ctgtacatcc acaaacagac 3120  
 gataacggct ctctcttta taggtgtaaa ccttaaactg cattcacca gtcctgttc 3180  
 tcgtcagcaa aagagccgtt cattcaata aaccgggcga cctcagccat cccttctga 3240  
 tttccgctt tccagcgttc ggcacgcaga cgacgggctt cattctgcat ggttgtgctt 3300  
 accagaccgg agatattgac atcatatatg ccttgagcaa ctgatagctg tcgctgtcaa 3360  
 ctgtcactgt aatacgtgc ttcatagcac acctctttt gacatacttc gggatacat 3420  
 atcagtatat attcttatac cgaaaaatc agcgcgcaa tacgcatact gttatctggc 3480  
 ttttagtaag ccggatccac gcgtttacgc cccgcctgc cactcatgc agtactgttg 3540  
 taattcatta agcattctgc cgacatggaa gccatcacag acggcatgat gaacctgaat 3600  
 cgccagcggc atcagcacct tgtgccttg cgtataatat ttgccatgg tgaacaggg 3660  
 ggcaagaag ttgtccatat tggccacgtt taaatcaaaa ctggtgaaac tcaccaggg 3720  
 attggctgag acgaaaaaca tatttcaat aaaccttta gggaaatagg ccaggttttc 3780  
 accgtaacac gccacatctt gcgaatatat gtgtagaac tgccggaaat cgtcgtggt 3840  
 ttactccag agcgatgaaa acgttcagt ttgtcatgg aaaacgggtg aacaagggtg 3900

aactatcc catatcacca gctcaccgtc ttctattgcc atacggaatt ccgcatgagc 3960  
attcatcagg cgggcaagaa tgtgaataaa ggccggataa aacttgtgct tatttttctt 4020  
tacggtcttt aaaaaggccg taatatccag ctgaacggtc tggttatagg tacattgagc 4080  
aactgactga aatgcctcaa aatgttcttt acgatgccat tgggatatat caacggtggc 4140  
atatccagtg attttttctt ccattttagc ttcttagct cctgaaaatc tcgccggatc 4200  
ctaactcaaa atccacacat tatacgagcc ggaagcataa agtgtaaagc ctgggggtgcc 4260  
taatgcggcc gccatagtga ctggatatgt tgtgttttac agtattatgt agtctgtttt 4320  
ttatgcaaaa tctaatttaa tatattgata ttatatcat ttacgtttc tcgttcagct 4380  
ttttgtaca aacttgtgat atcactagt cggccgcctg caggtcgact agaatagtaa 4440  
attgtaatgt tgtttgtgt tgttttgtt gtgtaattg ttgtaaaaat acggatcgtc 4500  
ctgcagtcct ctcaaataa aatgaacttc cttatataga ggaagggtct tgcgaaggat 4560  
agtgggattg tgcgtcatcc cttacgtcag tggagatac acatcaatcc acttgctttg 4620  
aagacgtggc tgaacgtct tcttttcca cgatgtcct cgtgggtggg ggtccatctt 4680  
tgggaccact gtcggcagag gcatcttgaa cgatagcctt tcctttatcg caatgatggc 4740  
attgttaggt gccaccttcc ttttctactg tccttttgat gaagtacag atagctgggc 4800  
aatggaatcc gaggaggttt cccgatatta cctttgttg aaaagtctca atagcccttt 4860  
ggtcttctga gactgtatct ttgatattct tggagtagac gagagtgtcg tgctccacca 4920  
tgttgacgaa gattttcttc ttgtcattga gtcgtaaaag actctgtatg aactgttcgc 4980  
cagtcttcac ggcgagtct gttagatcct cgatctgaat tttgactcc atggcctttg 5040  
attcagtagg aactacttc tttagagactc caatctctat tacttgcctt ggtttatgaa 5100  
gcaagccttg aatcgccat actggaatag tacttctgat ctgagaaaat atatctttct 5160  
ctgtgttctt gatgcagtta gtctgaatc tttgactgc atcttaacc ttcttgggaa 5220  
ggtatttgat ctctggaga ttattactcg ggtagatcgt ctgatgaga cctgccgcgt 5280  
aggcctctct aaccatctgt gggtcagcat tcttctgaa attgaagagg ctaatcttct 5340  
cattatcggc ggtgaacatg gtatcgtcac cttctccgtc gaactttctt ctagatcgt 5400  
agagatagag aaagtcgtcc atggtagatc ccggggcaaa ggagatcagc ttggctctag 5460

tcgaccatat gggagagctc aagcttagct tgagcttga tcagattgtc gtttcccgcc 5520  
ttcagtttaa actatcagtg ttgacagga tatattggcg ggtaaaccta agagaaaaga 5580  
gcgtttatta gaataacgga tatttaaaag ggcgtgaaaa ggtttatccg ttcgtccatt 5640  
tgtatgtgca tgccaaccac agggttcccc tcgggatcaa agtactttga tccaaccct 5700  
ccgctgctat agtgcagtcg gcttctgacg ttcagtgcag ccgtcttctg aaaacgacat 5760  
gtcgacaag tcctaagtta cgcgacaggc tgccgccctg cccttttct ggcgttttct 5820  
tgtcgcgtgt tttagtcgca taaagtagaa tacttgcgac tagaaccgga gacattacgc 5880  
catgaacaag agcgccgccc ctggcctgct gggctatgcc cgcgtcagca ccgacgacca 5940  
ggacttgacc aaccaacggg ccgaactgca cgcggccggc tgcaccaagc tgttttccga 6000  
gaagatcacc ggcaccaggc gcgaccgccc ggagctggcc aggatgcttg accacctacg 6060  
ccctggcgac gttgtgacag tgaccaggct agaccgcctg gccgcagca cccgcgacct 6120  
actggacatt gccgagcgca tccaggaggc cggcgccggc ctgcgtagcc tggcagagcc 6180  
gtgggccgac accaccacgc cggccggccg catggtgttg accgtgttcg ccggcattgc 6240  
cgagttcgag cgttcctaa tcactgaccg caccgggagc gggcgcgagg ccgccaaggc 6300  
ccgaggcgtg aagtttggcc cccgcctac cctaccccc gcacagatcg cgcacgcccc 6360  
cgagctgac gaccaggaag gccgcaccgt gaaagaggcg gctgcaactgc ttggcgtgca 6420  
tcgctcgacc ctgtaccg cgacttgagcg cagcgaggaa gtgacgcca ccgaggccag 6480  
gcggcgcggt gccttccgtg aggacgcatt gaccgaggcc gacgccctgg cggccgccga 6540  
gaatgaacgc caagaggaac aagcatgaaa ccgcaccagg acggccagga cgaaccgttt 6600  
ttcattaccg aagagatcga ggcggagatg atcgggccg ggtacgtgtt cgagccgccc 6660  
gcgcacgtct caaccgtcg gctgcatgaa atcctggccg gtttgtctga tgccaagctg 6720  
gcggcctggc cggccagctt ggccgctgaa gaaaccgagc gccgccgtct aaaaaggta 6780  
tgtgtatttg agtaaaacag cttgcgtcat gcggtcgtg cgtatatgat gcgatgagta 6840  
aataaaciaa tacgaaggga gaacgatga aggttatcgc tgtacttaac cagaaaggcg 6900  
ggtcaggcaa gacgaccatc gcaaccatc tagcccgcg cctgcaactc gccggggccg 6960  
atgttctgtt agtcgattcc gatccccagg gcagtgcccg cgattggcg gccgtgcggg 7020

aagatcaacc gctaaccgtt gtcggcatcg accgcccac gattgaccgc gacgtgaagg 7080  
ccatcggccg ggcgcacttc gtagtgatcg acggagcgcc ccaggcggcg gacttggtcg 7140  
tgtcccgat caaggcagcc gacttcgtgc tgattccggt gcagccaagc ccttacgaca 7200  
tatggggcac cgccgacctg gtggagctgg ttaagcagcg cattgaggtc acggatggaa 7260  
ggctacaagc ggcctttgtc gtgtcgccgg cgatcaaagg cacgcgcatc ggcggtgagg 7320  
ttgccgaggc gctggccggg tacgagctgc ccattctga gtcccgatc acgcagcgcg 7380  
tgagctacc aggcactgcc gccgccgga caaccgttct tgaatcagaa cccgaggcg 7440  
acgctgcccg cgaggctcag gcgctggccg ctgaaattaa atcaaaactc atttgagtta 7500  
atgaggtaaa gagaaaatga gcaaaagcac aaacacgcta agtgccggcc gtccgagcgc 7560  
acgcagcagc aaggctgcaa cgttggccag cctggcagac acgccagcca tgaagcgggt 7620  
caacttcag ttgccggcgg aggatcacac caagctgaag atgtacgcgg tacgccaagg 7680  
caagaccatt accgagctgc tatctgaata catcgcgag ctaccagagt aaatgagcaa 7740  
atgaataaat gagtagatga attttagcgg ctaaaggagg cggcatggaa aatcaagaac 7800  
aaccaggcac cgacgccgtg gaatgccca tgtgtggagg aacgggcggt tggccaggcg 7860  
taagcggctg ggttgtctgc cggcctgca atggcactgg aaccccaag cccgaggaat 7920  
cggcgtgacg gtcgcaaacc atccggcccc gtacaaatcg gcgcgcgct gggatgatgac 7980  
ctggtggaga agttgaaggc cgcgaggcc gccagcggc aacgcatga ggcagaagca 8040  
cgccccggtg aatcgtggca agcggccgt gatcgaatcc gcaaagaatc ccggcaaccg 8100  
ccggcagccg gtgcgccgtc gattaggaag ccgcccaagg gcgacgagca accagatttt 8160  
ttcgttcga tgcttatga cgtgggcacc cgcatagtc gcagcatcat ggacgtggcc 8220  
gtttccgtc tgcgaagcg tgaccgacga gctggcgagg tgatccgta cgagcttca 8280  
gacgggcacg tagaggtttc cgaggggccg gccggcatgg ccagtgtgtg ggattacgac 8340  
ctggtactga tggcggtttc ccatctaacc gaatcatga accgataccg ggaagggaag 8400  
ggagacaagc ccggccgctg gttccgtcca cacgttgccg acgtactca gttctgccg 8460  
cgagccgatg gcggaagca gaaagacgac ctggtagaaa cctgcattcg gttaaacacc 8520  
acgcacgtg ccatgcagcg tacgaagaag gccaaagac gccgcctggt gacggtatcc 8580

gaggggtgaag ccttgattag ccgctacaag atcgtaaaga gcgaaaccgg gcggccggag 8640  
tacatcgaga tcgagctagc tgattggatg taccgcgaga tcacagaagg caagaaccgg 8700  
gacgtgctga cggttcacc cgattacttt ttgatcgatc ccggcatcgg ccgttttctc 8760  
taccgcctgg cacgccgcgc cgcaggcaag gcagaagcca gatggttggt caagacgatc 8820  
tacgaacgca gtggcagcgc cggagagttc aagaagttct gtttcaccgt gcgcaagctg 8880  
atcgggtcaa atgacctgcc ggagtagcat ttgaaggagg aggcggggca ggctggcccc 8940  
atcctagtca tgcgtaccg caacctgatc gagggcgaag catccgccgg ttctaattgt 9000  
acggagcaga tgctagggca aattgccta gcaggggaaa aaggtcgaaa aggtctcttt 9060  
cctgtggata gcacgtacat tgggaacca aagccgtaca ttgggaaccg gaaccgtac 9120  
attgggaacc caaagccgta cattgggaac cggtcacaca tgtaagtgc tgatataaaa 9180  
gagaaaaaag gcgattttc gcctaaaac tctttaaac ttattaaaac tcttaaaacc 9240  
cgctggcct gtgcataact gtctggccag cgcacagccg aagagctgca aaaagcgctt 9300  
acccttcggt cgctgcgtc cctacgccc gccgcttcgc gtcggcctat cgcggccgct 9360  
ggccgctcaa aaatggctgg cctacggcca ggcaatctac cagggcgcg acaagccgag 9420  
ccgtgccac tcgaccgccc gcgccacat caaggcacc tgctcgcgc gtttcggtga 9480  
tgacggtgaa aacctctgac acatgcagct cccggagacg gtcacagctt gtctgtaagc 9540  
ggatgccggg agcagacaag cccgtcaggg cgcgtcagcg ggtgttggcg ggtgtcgggg 9600  
cgagccatg acccagtcac gtagcgatag cggagtgtat actggcttaa ctatgcggca 9660  
tcagagcaga ttgtactgag agtgcacat atgcggtgtg aaataccgca cagatgcgta 9720  
aggagaaaat accgcatcag gcgtcttcc gcttctcgc tcaactgact gctgcgctc 9780  
gtcgttcggc tgcggcgagc ggtatcagct cactcaaagg cgtaatacg gttatccaca 9840  
gaatcagggg ataacgcagg aaagaacatg tgagcaaaag gccagcaaaa ggccaggaac 9900  
cgtaaaaagg ccgctgtgt ggctttttc cataggctcc gccccctga cgagcatcac 9960  
aaaaatcgac gctcaagtca gaggtggcga aaccgacag gactataaag ataccaggcg 10020  
ttccccctg gaagctcct cgtgcgtct cctgttccga cctgccgct taccggatac 10080  
ctgtccgctt ttctccttc gggaagcgtg gcgctttctc atagctcac ctgtaggtat 10140

ctgagttcgg ttaggtcgt tcgtccaag ctgggctgtg tgcacgaacc cccggtcag 10200  
 cccgaccgct gcgccttacc cggtaactat cgtcttagt ccaacccggt aagacacgac 10260  
 ttatgccac tggcagcagc cactggtaac aggattagca gagcgaggta ttaggcggt 10320  
 gctacagagt tctgaagtg gtggcctaac tacggctaca ctagaaggac agtatttgg 10380  
 atctgcgctc tgctgaagcc agttacctc ggaaaaagag ttgtagctc ttgatccggc 10440  
 aaacaaacca ccgctggtag cgggtggttt ttgtttgca agcagcagat tacgcgcaga 10500  
 aaaaaggat ctcaagaaga tcctttgac tttctacgg ggtctgacgc tcagtgaac 10560  
 gaaaactcac gtaagggtat ttggtcatg catgatata ctccaattt gttagggct 10620  
 tattatgcac gcttaaaaat aataaaagca gacttgacct gatagttgg ctgtgagcaa 10680  
 ttatgtgctt agtgcattc atcgcttag ttaacgccgg cgaagcggcg tcggcttga 10740  
 cgaatttcta gctagacatt atttccgac tacctgggtg atctgcctt tcacgtagt 10800  
 gacaaattct tccaactgat ctgcgcgca ggccaagcga tcttctctt gtccaagata 10860  
 agcctgtcta gcttaagta tgacgggctg atactgggcc ggcaggcgt ccattgcca 10920  
 gtcggcagcg acatcctcg gcgcgattt gccggttact gcgctgtacc aaatgcggga 10980  
 caacgtaagc actacattc gctcatgcc agccagtcg ggcggcgagt tccatagcgt 11040  
 taaggtttca tttagcctt caaatagatc ctgttcagga accggatcaa agagttcctc 11100  
 cgccgctgga cctaccaagg caacgctatg ttctttgct ttgtcagca agatagccag 11160  
 atcaatgtcg atcgtggctg gctgaagat acctgcaaga atgtcattgc gctgccattc 11220  
 tccaaattgc agttcgcgt tagctggata acgccacgga atgatgtcgt cgtgcacaac 11280  
 aatggtgact tctacagcg gcgagaatct gctcttcca ggggaagccg aagtttcaa 11340  
 aaggtcgtg atcaaagctc gccgcgttgt ttcatcaagc cttacggtca ccgtaaccag 11400  
 caaatcaata tcactgttg gcttcaggcc gccatccact gcggagccgt acaaatgtac 11460  
 ggccagcaac gtcggttga gatggcgctc gatgacgca actacctctg atagttgagt 11520  
 cgatactcg gcgatcaccg ctcccccat gatgtttaac ttgttttag ggcgactgcc 11580  
 ctgctcgta acatcgttg tgctcataa catcaaacat cgaccacgg cgtaacgcgc 11640  
 ttgctgctg gatgccgag gcatagactg taccctaaaa aaacatgtca taacaagaag 11700

ccatgaaaac cgccactgcg ccgttaccac cgctgcgttc ggtcaagggt ctggaccagt 11760  
tgcgtgacgg cagttacgct acttgcatca cagcttacga accgaacgag gcttatgtcc 11820  
actgggttcg tgcccgaatt gatcacaggc agcaacgctc tgtcatcggt acaatcaaca 11880  
tgctaccctc cgcgagatca tccgtgttcc aaaccggca gcttagttgc cgttcttccg 11940  
aatagcatcg gtaacatgag caaagtctgc cgccttaca cggtctctcc gctgacgccg 12000  
tcccgactg atgggctgcc tgcctcaggt ggtgattttg tgccgagctg ccggtcgggg 12060  
agctgttggc tggctggtgg caggatata tgtggtgtaa acaaattgac gcttagacaa 12120  
cttaataaca cattgcggac gttttaatg tactgaatta acgccgaatt gaattatcag 12180  
cttgcacgcc ggtcgatcta gtaacataga tgacaccgcg cgcgataatt taccctagtt 12240  
tgcgcgctat attttgttt ctatcgcgta ttaaatgtat aattgcggga ctctaactat 12300  
aaaaacccat ctcataaata acgtcatgca ttacatgtta attattacat gcttaacgta 12360  
attcaacaga aattatatga taatcatcgc aagaccggca acaggattca atcttaagaa 12420  
actttattgc caaatgtttg aacgatctgc ttgactctag ggaattaatt cctgaatcac 12480  
tgcgaccggc cctcccgca cccagccgag cgagcttagc gaactgtgga cgagaactgt 12540  
gccaccaagc gtaaggccgt tctctcgcgt ttgccttgct aggctcgcgc gagttgctgg 12600  
ctgaggcggt ctgaaatca gctctgttc ggtcggcatc tactctattc ctttgcctc 12660  
ggacgagtgc tggggcgctg gttccacta tcggcgagta cttctacaca gccatcggtc 12720  
cagacggccg cgcttctgcg ggcgatttgt gtacgccga cagtcccggc tccgatcgg 12780  
acgattgcgt cgcacgacc ctgcgccaa gctgcatcat cgaaattgcc gtcaaccaag 12840  
ctctgataga gttggtcaag accaatgcgg agcatatacg cccggagcct tggcgatcct 12900  
gcaagctccg gatgctccg ctgaagtag cgcgtctgct gctcataca agccaaccac 12960  
ggcctcaga agaagatgtt ggcgacctg tattgggaat ccccgaacat cgctcgtc 13020  
cagtcaatga ccgctgttat gcggccattg tccgtcagga cattgttga gccgaatccg 13080  
cgtgcacgag tgccggactt cggggcagtc ctgcccaaa gcatcagctc atcgagagcc 13140  
tgccgacgg acgcactgac ggtgtcgtcc atcacagttt gccagtata cacatgggga 13200  
tcagcaatcg cgcatatgaa atcacgcat gtagtgtatt gaccgattcc ttgcggtccg 13260

aatgggccga acccgctcgt ctggctaaga tcggccgcag cgatagcatc catagcctcc 13320  
gcgaccggct gaagaacagc gggcagttcg gtttcaggca ggtcttgcaa cgtgacaccc 13380  
tgtgcacggc gggagatgca ataggtcagg ctctcgctga actccccaat gtcaagcact 13440  
tccggaatcg ggagcgcggc cgatgcaaag tgccgataaa cataacgac tttgtagaaa 13500  
ccatcggcgc agctatttac ccgcaggaca tatccacgcc ctctacatc gaagctgaaa 13560  
gcacgagatt cttcgccctc cgagagctgc atcaggctcg agacgctgc gaacttttcg 13620  
atcagaaact tctcgacaga cgtcgcggcg agttcaggct tttcatagg ggggattcga 13680  
gttgagagtg aatatgagac tctaattgga taccgagggg aatttatgga acgtcagtgg 13740  
agcattttg acaagaaata ttgctagct gatagtacc ttaggcgact ttgaacgcg 13800  
caataatggt ttctgacgta tgtgcttagc tcattaaact ccagaaaccc gcggctcagt 13860  
ggctcctca acgttcgggt tctgtcagtt ccaaacgtaa aacggcttgt cccgcgtcat 13920  
cggcggggtc ataactgac tcccttaatt ctcatgtatg ataattcgag ggtaccggg 13980  
gatcct 13986

**Supplementary Figure S1. Vector pH7GWIWG2(I) used for transformation of *P. tremula* x *tremuloides*.**

Vector pH7GWIWG2(I)

LSD1

>gi|224115559|ref|XM\_002317030.1| *Populus trichocarpa* predicted protein, mRNA (540 bp)

ATGCAGAGCCAGGTGGTGTGTAGAGGGTGTAGAAGTTTATTGTTATATCCAAGTGGAGCTACT  
AATGTTTGTGTGCTTTATGTAGTACCGTTACCTCTATTCTGCTCCTGGGATGGACTTGGCTCA  
ACTCATATGTCGAGGTTGCAGGACATTGCTAATGTATGCACGGGGGGCAACAACTGTGAGAT  
GCTCCTGCTGCCACATAGTGAACCTTGCACCAGTAGGACCTAACCAGGTTGCTCATGTCAACT  
GTGGGAACTGCCAGACTACACTTATGTATCCGAATGGTGCTCCATCTGTCAAGTGTGCGGTCT  
GTCACTATGTTACTAACATTAGTACGGCTAATGTGAGAGTCCGCTTCCAGCAAACAGACCTA  
GTGGTATAGGTGGAACAATGCCGTCTACTTCAACAGTAAGTAACTGGACTTACTTTTCTTTCTTCT

GACTCAAACGTGTCGTTGTGGAACCCCTATGTCTGTTGATGAAAGTGGCAAATTGGTCAGCAA  
TGTGTTGTTGGTGTCACTACAGAAAAAAATAA (insert 86 bp)

EDS1

>gi|224121609|ref|XM\_002318590.1| Populus trichocarpa disease resistance protein, mRNA (2084 bp)

GACGACGAAACCGACCATTCTGCCTATAGTTTAACGCGTGTTTCATTCTTTCATGTCTGAAAG  
ATAACAAGAAAGAATCCAAAGCTGCAAATTCCCGAAAAAATCGAAAGCCAGTGATGGGTAC  
TGTCAAGCTTGGAGAGAACATGGAGATCAAAGAAGTGGTTATCCAGAAAGCATGCTCAATGG  
CCATGAATGCTCACAAATCTCCAGAGAAGCAATATCTTTCTAAAAAGATTAGAACTTCATCAT  
CTGAAGTTGTCTTTAGCTTTCCTGGATCTTGGTCTGTAAATGATTGGTTTGCTGGAACCTCCTTT  
GGAGAAACGAAGATGGATCCTCAGCTCTTTCCTTCTCTCAAATATGTTGGTCTTGATGTAACTG  
CTACTGTAAACGAAGTCTTCTCAATAGATTCAAAGCAGTTTTGGCTAATCCACAGTTCCAAA  
TTGAGGTGGAAAAAGCTGCGACAGACAGGAGGCAAATTGTATTTACAGGCCACTCTTCAGGA  
GGGGCAATTGCCATACTGGCAACAATTTGGTTCTTGGAAAGAGCAAATTAGAAAAAGCTCCAA  
CTGGATTGCGCCACTCTGTCTGACTTTTGGATCTCCACTTGTGGTGATCGCATTATAAACCTTG  
CACTTAGGCGTGAAAACCTGGTCTCGCTACTTTGTGAATTTTCGTTATGAGATGCGACATTGTTCC  
TCAGATTTCACTCAGTCCACTCTCTTCCATTAATCAAAAACCTGCAGCAAGTTCTTGATTACTTT  
AATCAAAAAGCGCAACAACCTCCTAATGAAGCTCCAGCTTTCTATGTAAGTGTGGTGAAAAA  
TGCATCGTCTGTTGCTAATTATGCTGCCTGTAAGATCATGGGAAGCACGAATCCTTTATTGGAG  
ACTATATCAAGTTTCATTGAACTGAGTCCTTACAGACCCTTAGGGACCTATGTTTTCTGCACAG  
GAAATGGGAAACTTGTTGTCTCAAGTAACCCAGATGCTGTGCTGCAAGTACTGTACTATGCCT  
CCCAGTTGAGCACTGGAGAAGCAAGAGAAAAAGTTGAAGTTGCCCAAACAAGCCTAAGAGA  
TCATTTGAACTACGGAAATGACTTGCAAGAATACTTAAAAATGTCAATTGTAACATGTTTATA  
TCAGCATCATCCAGAAGCACTTCCGTTATCTTCGAATGTTGGAATGTTGAGCGTGGGAGAGT  
TGATGTGGCCTTGAATGACCTAGGCCTGAGTGAAAGAGCCAGACTGTGCATTCATGCTGCTGA  
AGCGTTAGAGAAGCAGAAGTTGAGGAACCAGGCATCAATTGAAGAAAAGCAGAAAGATATT  
GAGAAATGTTTAGATAAGCTAGAAAGCGTACAAAAAGAAGGGTGCACTCAAAGTTGGCTATTA

TGATGCCTTCAAGAGTTCAGAACAAAAGGAGGATTTCATGCTAATGTAGAGAGGCTTGAGC  
TAGCAGGTATATGGGATGAAATAATAGAAATGCTGAAAAGGAATGAACTCCCCGATGAGTTT  
GAGGGCCGGAAGACATGGATAGATCTTGGTACCAGGTATCGTCGCATTGTTGAACCCTTGAT  
ATTGCTAATTACTATCGACACCTCAAGAATGAAGACACAGGGCCCTATATGGGAAAGGGCAG  
GCCAAGACGGTATAAATGCACCCAAAGATGGCGGGAGCATGCTGAGCGATTGCCGCATGAA  
GTTCCAGGATCCTGTTTTTGGGCTGAGGTAGAGGAACTGTGCATTAAAACAAGCTGCCAGGGA  
ATTAAAGAAAGCATTCTCACCTAAATACCAAAGTCAAAAAGTGGATTAAAGATGGGGAACT  
GGGTGTTGATGTTCTGTTGGAGAATTCCACCTTTAATAAATTGCTGAAACAACATTTCTGACA  
AACTTTTCTCAGGATCTTGACCTAAGGAAGGAGTTGCATGTGCAGGGATTTGCAGATGCGTAA  
CTAATGTTATTCCGAGCCTTGTACACACCTGAGCAAGAACCTTTATCTGTATTAGATATTTTATT  
GTTATCTGTTCCACCCTGCAAAATAGTGTGAAATAAAATGCTTTTTTGATCAATAATAAAGGC  
AGAAAGGGAA (insert 151 bp)

PAD4

>gi|224083495|ref|XM\_002307015.1| Populus trichocarpa PAD4, mRNA (1509 bp)

ATGCAGACAAGCAAGTCAATTATCTTCACAGGCCATTCCGTAGGTGGAGCAACTGCCTCTCTT  
GCTGCTCTTTGGCTCCTCTCTTACCTTCAATCAAATTTCTTAAACCTCTCGGTACTATGCATCAC  
CTTTGGCTCTCCATTGCTAGGCAATGAGACCCTTTCTCGTGCCATTCTTCGCGAAAAATGGGGT  
GGCAAATTTTGCCATGTTGTATCGAAGTATGACATCATGCCAAGGATGCTCTTTGTTCCAATGG  
ATCCCATTGCTCCACTCTTAAAACCCCTGCTACATTTTTGGCACATGTATATGAATTCTCCGCA  
TTTTGGATTGCTTGCTGTACCGTTAAGTGATGACAGCATGGCTCAAATTTTCCAGCATGTATTA  
TTTCACTTGGAAGATTAGTAGAAGCTGGAGAAGAGGCAGTGACTGGTGGAATGTTGAGGCC  
ATTTGGGAACTATTTTTTCTGTTTCGGAAGATGGAGCAATTTGCGTGGACAATGCAGCATCTGTT  
GTTAAAATGATGTATTTGTTGTTTCGCGACGGGGTTGCCTAGCTCTAGCATTGGGGATCATCTCA  
AGTATGGTGATTACGTAGGGAAAATCTCCTTGCAATTTCTGGAGAAGAGGAGTTTCATGCAAG  
GAGAGCTTCCTGAATCAAGCTACGAAGCAGGTGTTGTATTGGCTTTGCAGTCCACAGGAATAT  
CTTGCAAGGAACAAATTGCAGGGCCAGCCAAAGATTGCCTAAAGGCTGCTAGGCGATTGGGG

CGCACACCAAACCTCAACTGTGCCAATCTGGCAATTAACTGTCCAAAATCAATCCTTATAGG  
GCTGAAATAGAGTGGTATAAAGCATTGTGCGACCGGTCTGATGATCAGATGGGTACTACGA  
CTCCTTTAAACAAAGGGGAGCCTCGAAAAGGGACTTCAAAGTCAACTTGAACCGGCACAAGC  
TGGCTCAGTTTTGGGATAACGTAATAAACTTGTTTGAAAGCAATCAACTCCCCCATGATTTTCA  
CAGACAAGGAAAATGGGTCAATGCTTCCCAGTTCTATAAGCTCCTTGTGGAGCCATTGGATAT  
TGCTGAGTATTATCGAACAGGCATGCATCGTAGCAAGGGGCATTACATTGAACATGGAAGGG  
AGAGGAGATATCGTATTTTTGATAGGTGGTGGAAAGAGAGAAGTGTTAGAGGGGAAAATTAT  
AAACGGAGCAAGTTTGCAAGTTTGACCCAAGACACATGCTTCTGGGCAAGAGTGGAGGAAGC  
CAGGGATTTGTTAGATGCTCTTAGAAGCACTAGTGATCCGAGTCATTTGGCTTTGCTTTGGCAG  
AAGATAGATAGTTTTGCGAGCGATGCAAACGCGTTGGTTGAAACTAAGGAGGTGTCTATAGA  
TGTAGTGGCAAAGAATTCAACCTATTCTTTGTGGCTAAAAGATTATAATGAATTGAAATCACA  
AAAGGTGCAATTCCGTCCCTTGTTTTTGAGTTTTGTGAATGAGGAAATGGTTCCATAG (insert 79  
bp)

**Supplementary Figure S2. cDNA sequences of LSD1, EDS1 and PAD4.** Short cDNA sequences inserted into silencing vector are highlighted in yellow, primers are highlighted in grey and underlined.

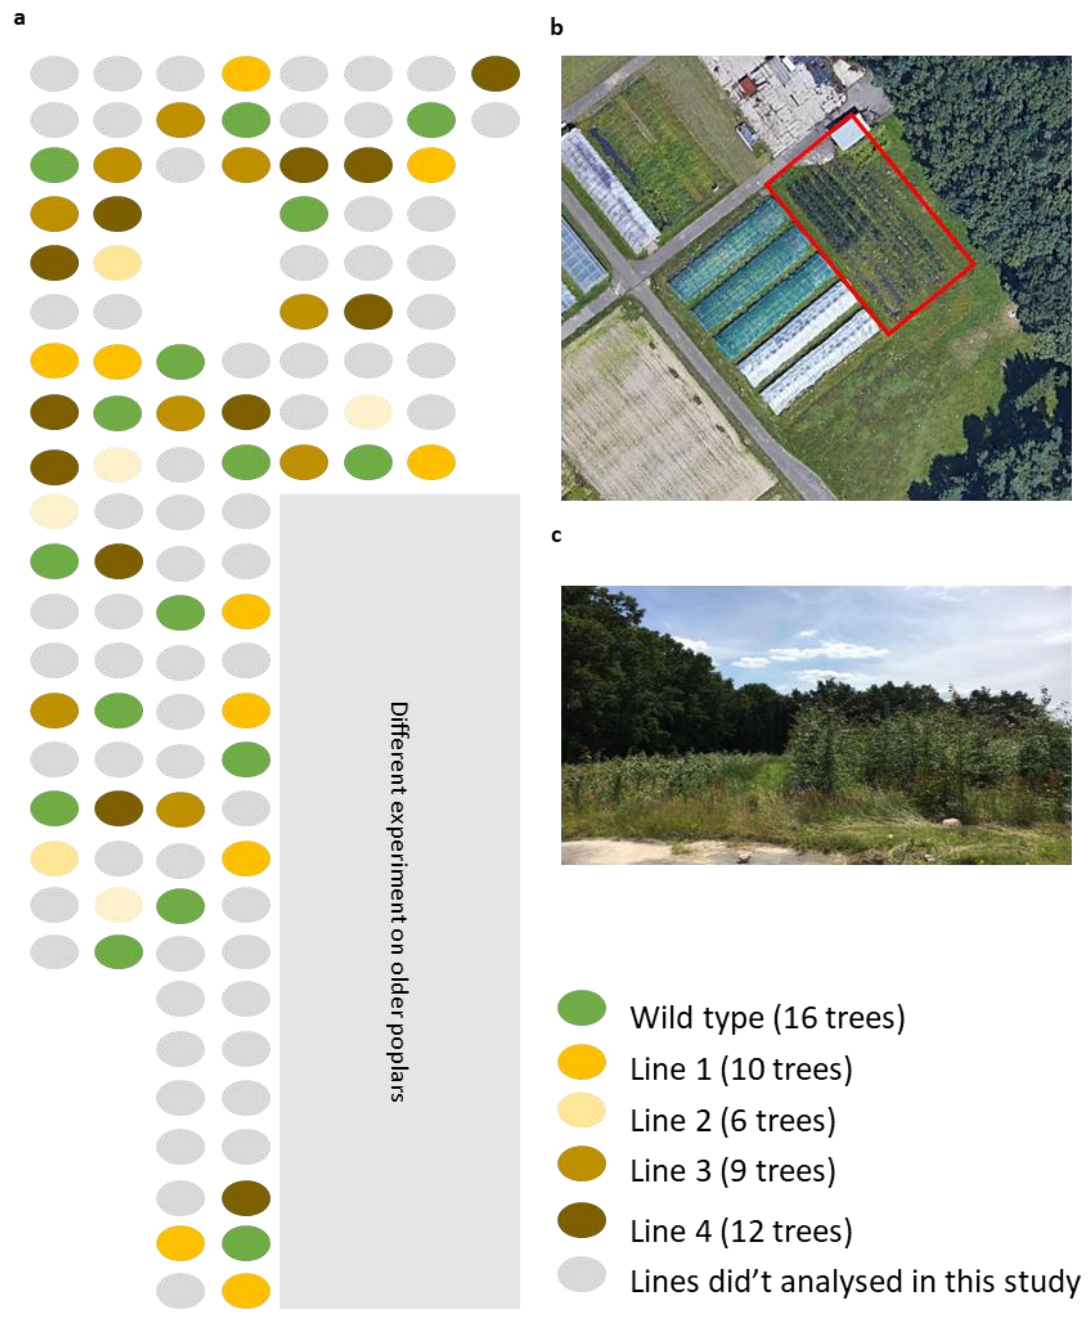

**Supplementary Figure S3. Scheme of aspen cultivation and field experiment.** Schematic presentation of experimental objects randomization in the field (a). Satellite image of the experimental field (GoogleMaps, USA), the field is marked with a red frame (b). Picture of the field experiment in the second year of the experiment (c).

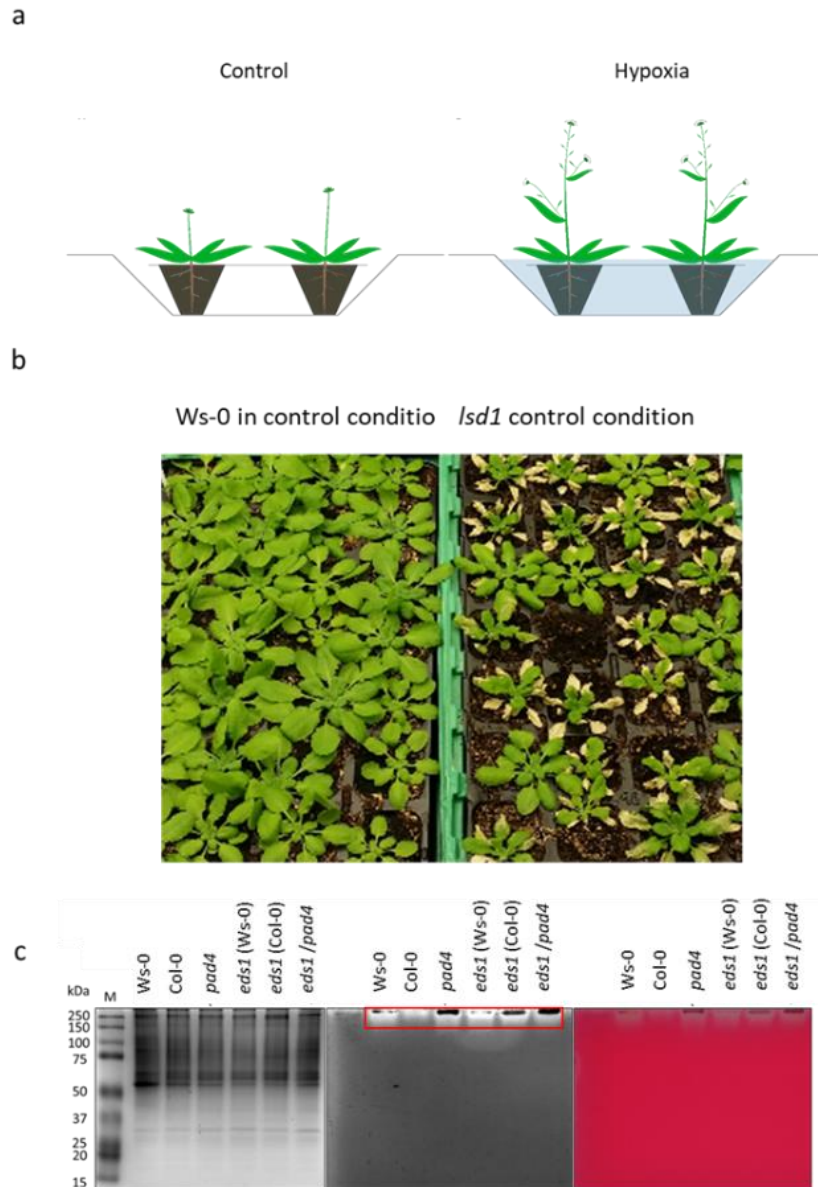

**Supplementary Figure S4. Technical details of experiments.** (a) Model of experimental setup for lysigenous aerenchyma formation in response to hypoxia stress. (b). Higher reducing sugar content in a *lsd1* mutant before and after hypoxia stress was detected. It is easily explainable because the *lsd1* mutant induces PCD during the 8-week growth in short photoperiod (8 hours of light and 16 hours of night) in controlled conditions and cannot survive the hypoxia stress. By contrast, a *eds1* mutant increased its reducing sugar content during the hypoxia stress. We did not observe decrease in reducing sugar content during the hypoxia stress in any other genotype. Comparison of a 8-week-old *Arabidopsis thaliana* plant, Ws-0 (left) and *lsd1* (right) (c). The *eds1* and *eds1/lsd1* mutants did not visually differ from Ws-0. Gel stained with Coomassie Brilliant Blue showing proteins of roots and

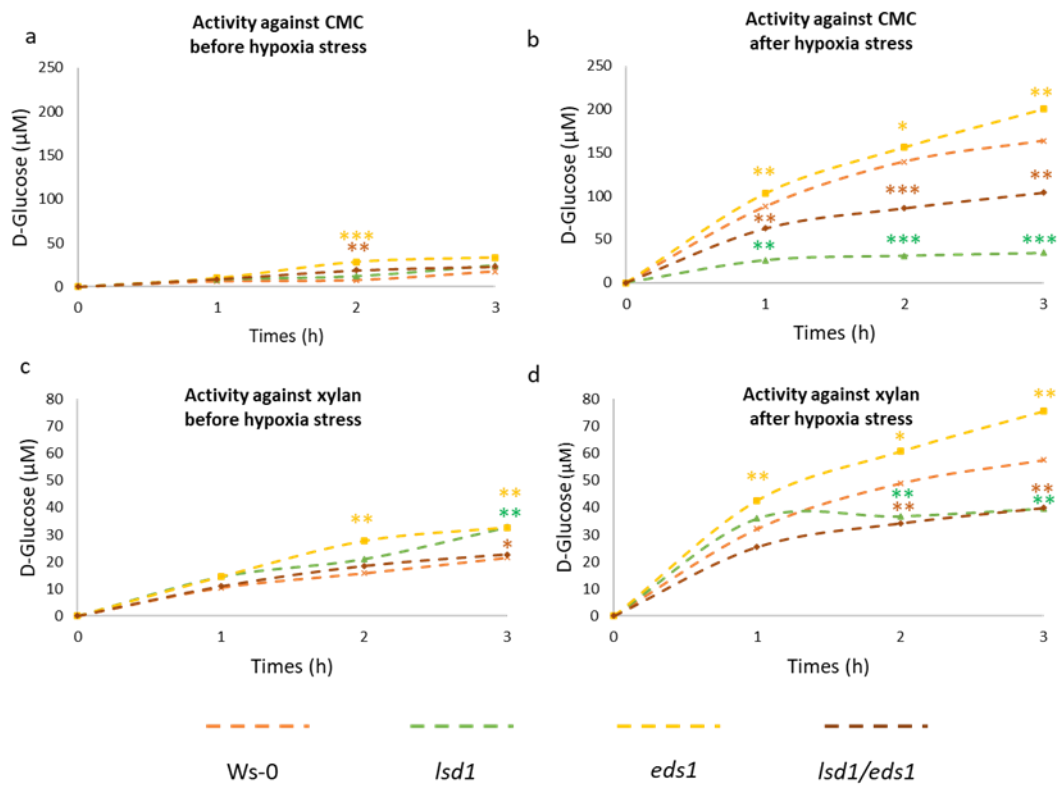

**Supplementary Figure S5 Glucanase and xylanase activities in roots and hypocotyls measured after hypoxia stress.** Protein extracts isolated before hypoxia stress exhibited lower activity against carboxymethyl cellulose (a) and xylan (c), compared to extracts isolated after hypoxia stress (b, d). Means values ( $\pm$ SD) are derived from separate biological replicates ( $n = 3$  to  $6$ ). Stars above the bars indicate statistically significant differences in comparison to the WT plants, according to the Tukey HSD at level  $p < 0.05$  (\*),  $p < 0.01$  (\*\*), and  $p < 0.001$  (\*\*\*).

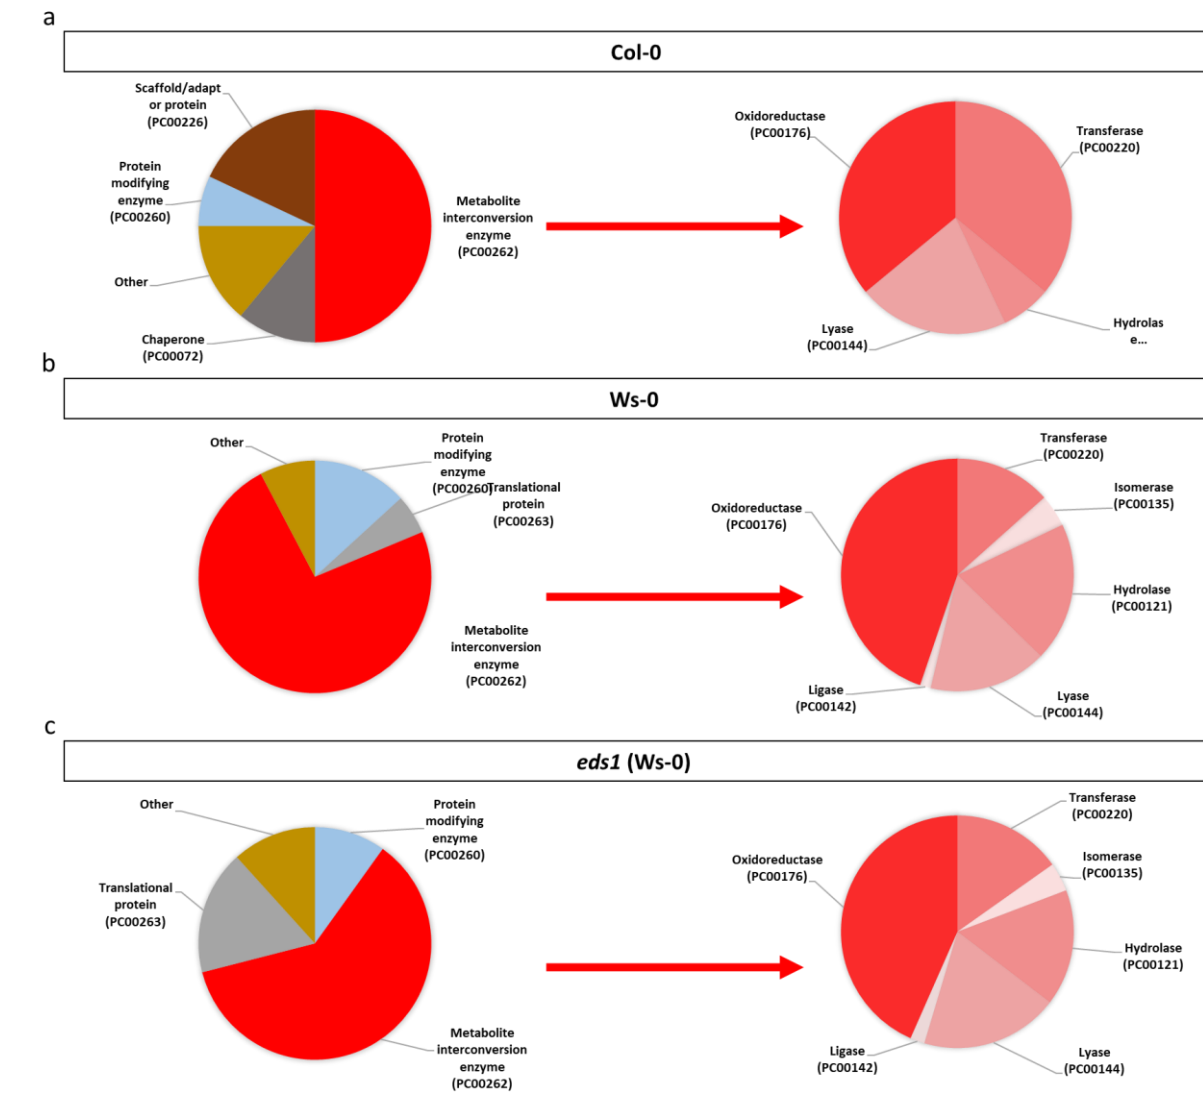

**Supplementary Figure S6. Protein classes analysis by Panther.org.** Pie chart presenting different protein classes taking part in hypoxia stress response and their abundance among identified proteins in tested genotypes; Col-0 (a), Ws-0 (b) and eds1 (Ws-0 background) (c) and pie chart presenting division of categories metabolite interconversion enzyme (PC00262) into subcategories (Right site). In order to obtain material for Maldi-TOF analysis, 6 separate experiments lasting one year in total were carried out. Then the Maldi-TOF analysis was performed and Data were based on 6 separate experiments (biological replicates) and two technical repetitions per sample. The results were analyzed using the Mascot software and trimmed so there would be not more than 1% of false positives in each sample.

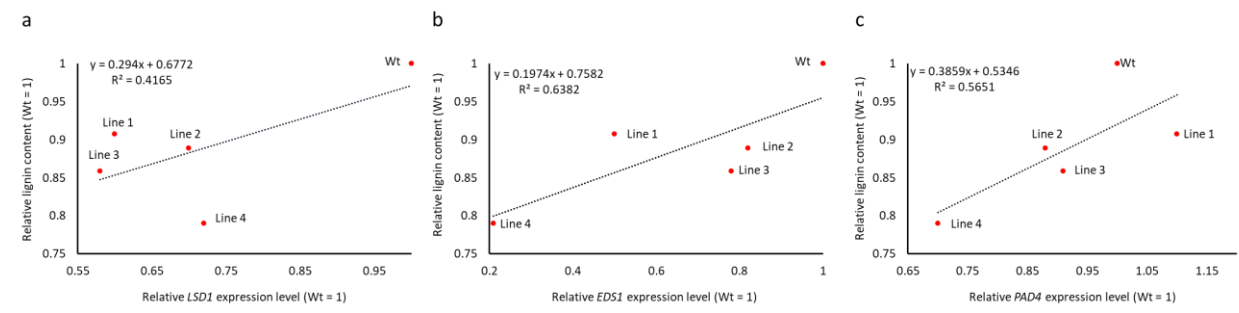

**Supplementary Figure S7.** Correlation of wood lignin content and deregulation of PtLSD1, PtEDS1 and PtPAD4 gene expression in leaf of tested lines. Correlation of lignin content (percent) and relative expression of LSD1 (a), EDS1 (b) and PAD4 (c).

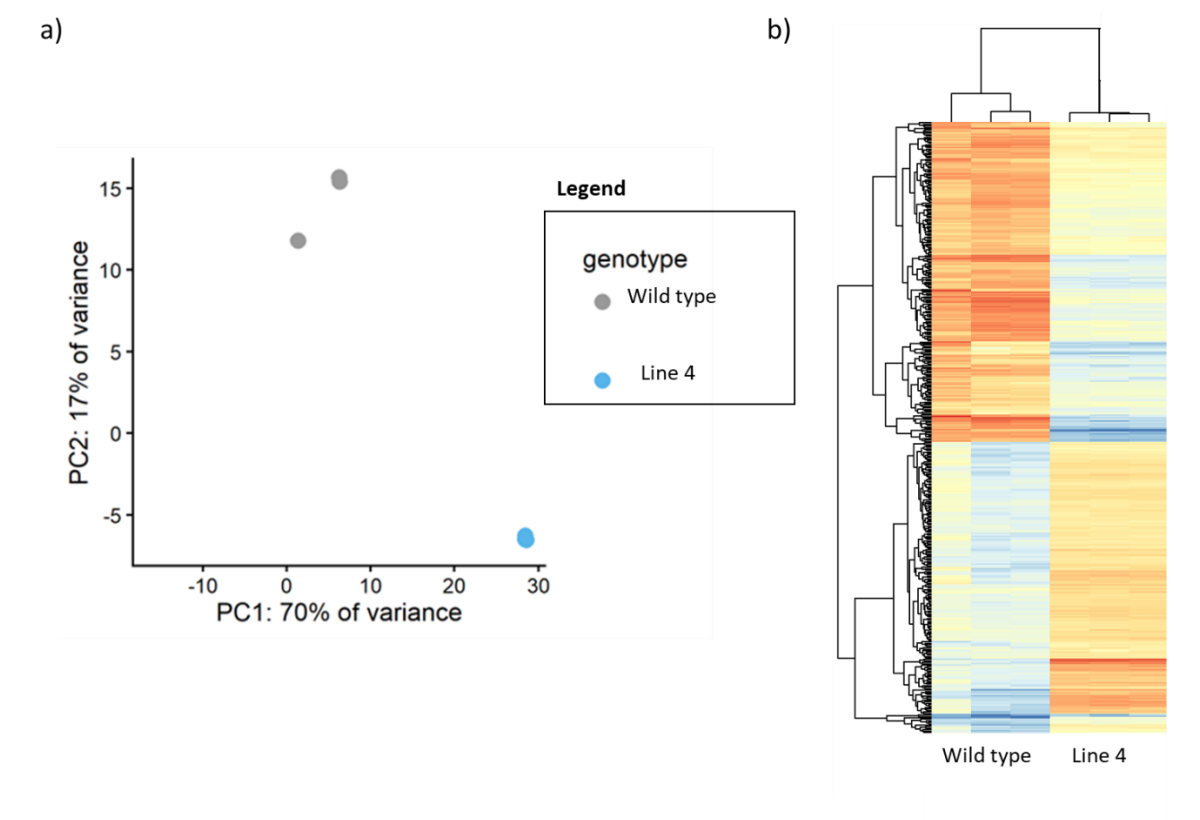

**Supplementary Figure S8.** RNAseq analysis of RNA isolated from cambium and differentiating xylem of wild type and transgenic Line 4 with the lowest relative lignin content (see Figure 3). The PCA analysis is showing huge differences between RNA samples isolated from cambium and differentiating xylem tissue of wood of wild type and Line 4 (a) and heat map of differently deregulated genes in wild type and Line 4 (b). The analysis was made on three independent biological repeats ( $n = 3$ ).

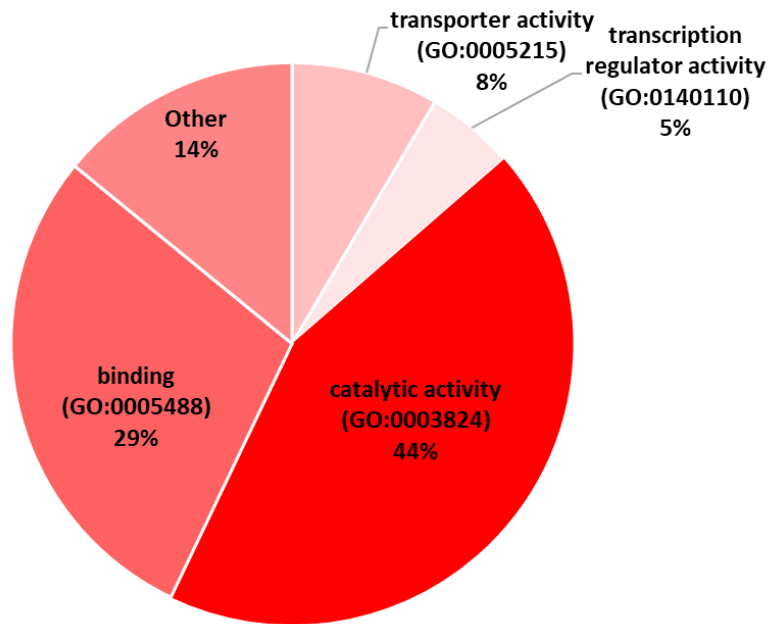

---

**Supplementary Figure S9.** Gene ontology analysis of deregulated genes in Line 4 in terms of their molecular function.

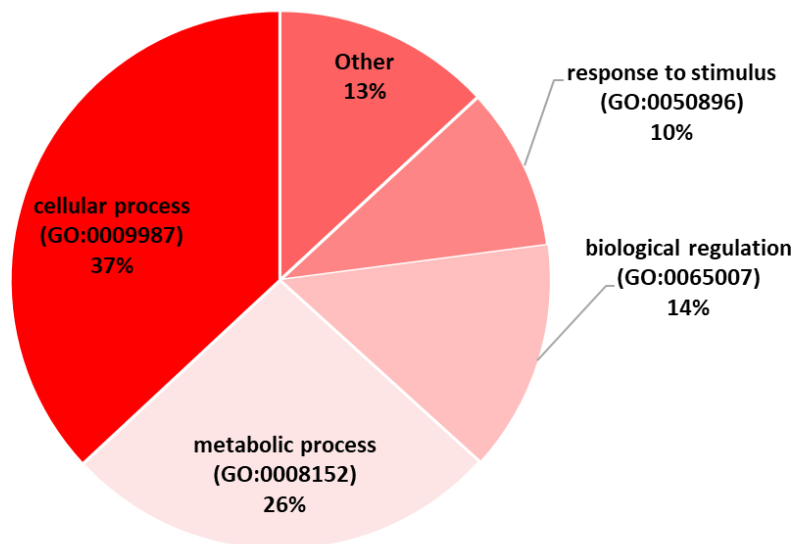

---

**Supplementary Figure S10.** Gene ontology analysis of deregulated genes in Line 4 in terms of biological processes.

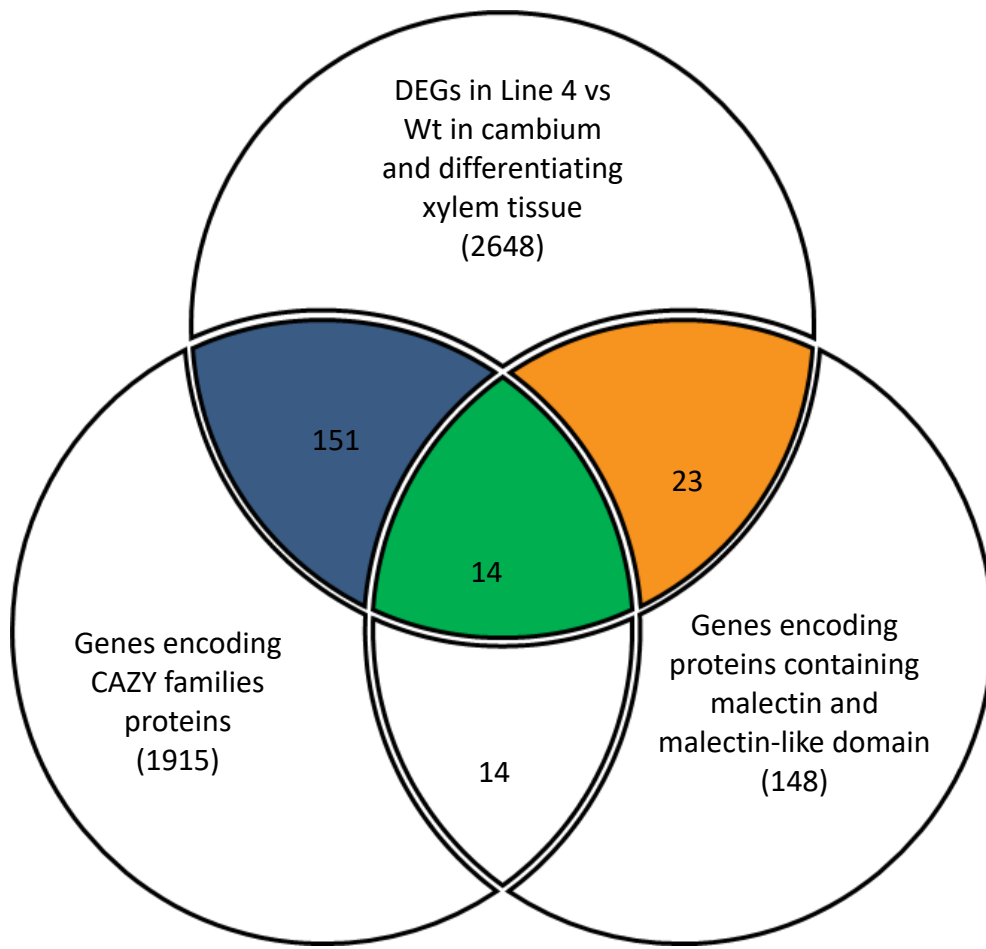

**Supplementary Figure S11.** Results of Line 4 DEGs and its comparison to genes encoding proteins from CAZY families and genes encoding malectin and malectin-like domain-containing proteins.

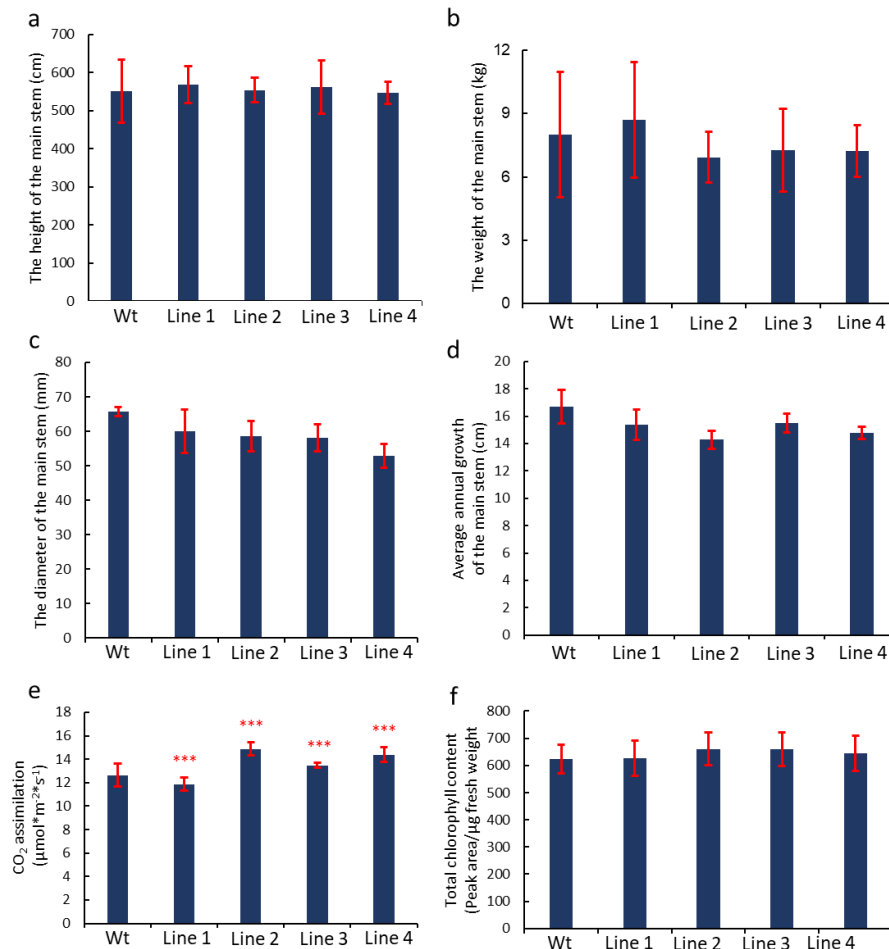

**Supplementary Figure S12. Biometric parameters, CO<sub>2</sub> assimilation, and chlorophyll content in transgenic lines.** Height of the main stem (**a**), fresh weight of the main stem (**b**), diameter of the main stem (**c**), average annual growth of the main stem (**c**), CO<sub>2</sub> assimilation (**d**), total chlorophyll content in leaves (**f**). Stars above the bars indicate statistically significant differences in comparison to the WT plants, according to Tukey HSD at level  $p < 0.05$  (\*),  $p < 0.01$  (\*\*), and  $p < 0.001$  (\*\*\*). Mean values ( $\pm$ SD) for five to eleven different biological replications for data on graphs A and B ( $n = 5$  to 11), for three different biological replications on graph C ( $n=3$ ), for four different biological replications on graph D ( $n = 4$ ), for 30 different leaves *per* genotype on graph E ( $n = 30$ ) and from nine different technical replications of pooled leaf sample *per* genotype on graph F ( $n = 9$ ).
